# Supplementary material
Source: PubMed Central journal article supplement (PMC8672329)

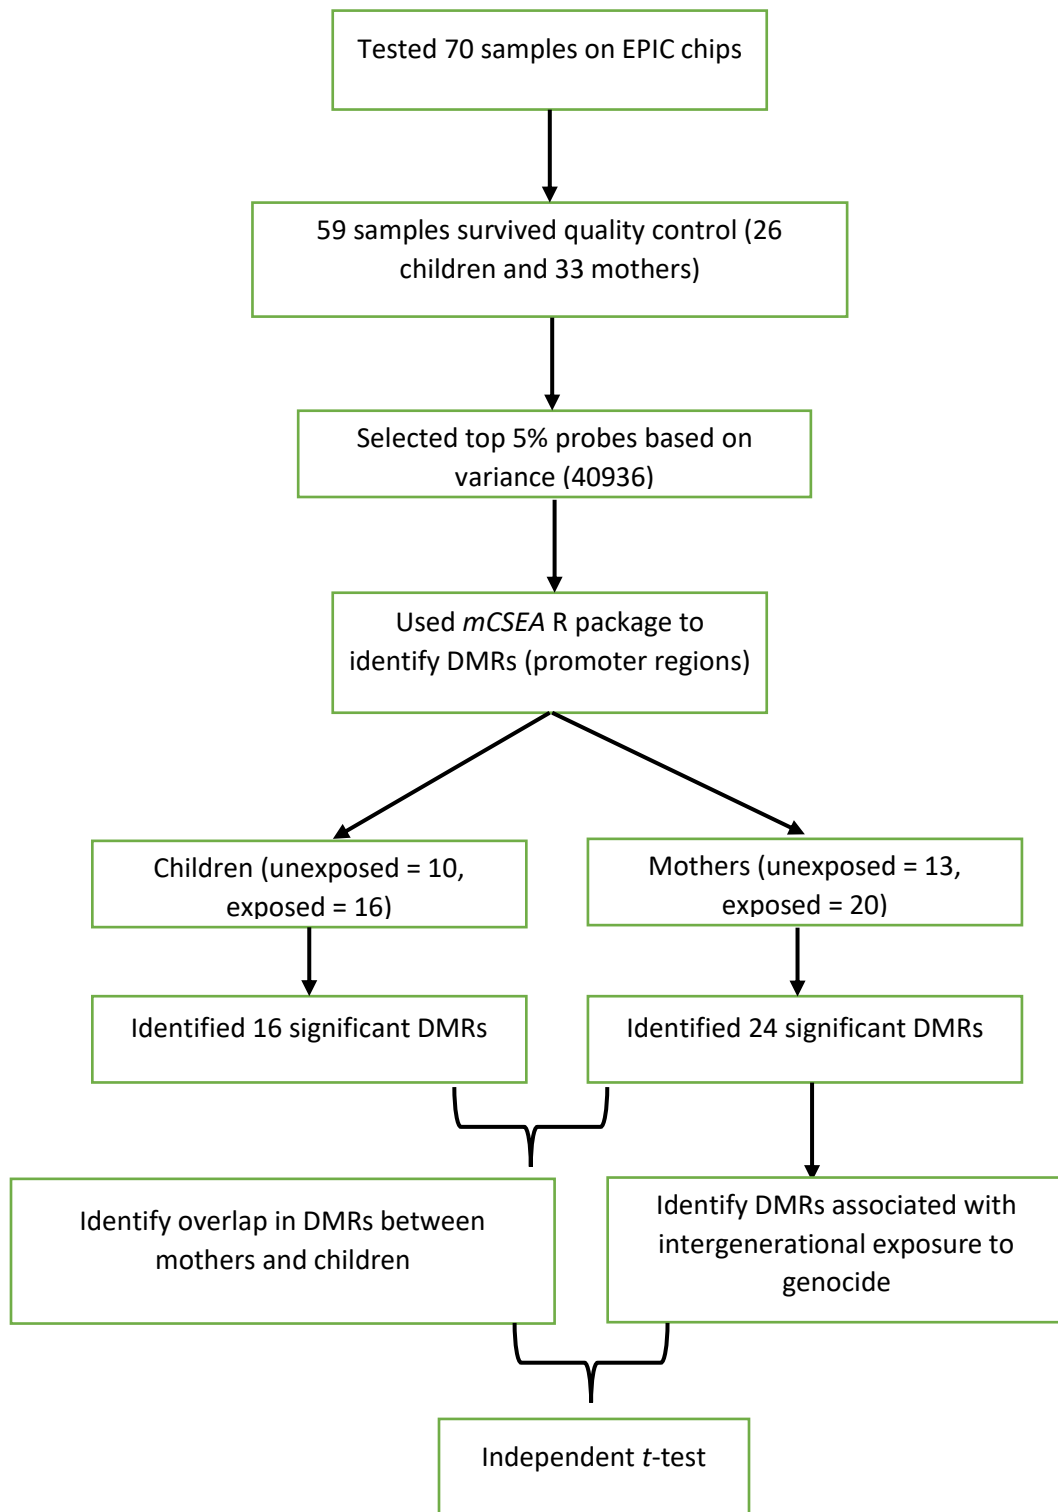

Figure S1. The overall workflow of the analytical approach

Supplement: epi-14-11-s1.pdf [file epi-14-11-s1.pdf]
